# Supplementary material for: Numerical Integration of Some Arbitrary Functions over an Ellipsoid by Discretizing into Hexahedral Elements for Biomaterial Studies
Source: Hindawi journal article supplement (doi:10.1155/2024/5321249), 2024-01-01
Supplement: f1 [file 5321249.f1.docx]

**Supplementary Files**

**Numerical Integration of Some Arbitrary Functions over an Ellipsoid by Discretizing into Hexahedral Elements for Biomaterial Studies**

**T.M. Mamatha1, B. Venkatesh1*, P. Senthil Kumar2*, S. Mullai Venthan1, M.S. Nisha3, Gayathri Rangasamy4,5**

*1Department of Mathematics, Amrita School of Engineering, Amrita Vishwa Vidyapeetham, Bengaluru, India.*

*2Centre for Pollution Control and Environmental Engineering, Pondicherry University, School of Engineering and Technology, Kalapet, Puducherry- 605014. India.*

*3School of Aeronautical Sciences, Hindustan Institute of Science and Technology, Chennai, India.*

*4School of Engineering, Lebanese American University, Byblos, Lebanon*

*5Department of Sustainable Engineering, Institute of Biotechnology, Saveetha School of Engineering, SIMATS, Chennai, 602105, India*

*Corrseponding Authors Email IDs:*

[*b_venkatesh@blr.amrita.edu*](mailto:b_venkatesh@blr.amrita.edu)(B. Venkatesh);

*senthilkumarp@pondiuni.ac.in* (P. Senthil Kumar)

**Algorithm, Coding and Results**

Ellipse to 10-Noded Tetrahedron (Six Tetrahedron in First Octant) and then Transformed into Hexahedron

**Volume S1**

u=[0.227881629001553 0.273845532845421 0.273845532845421 0.061060698460855 0.341717079316923 0.073376689376801 0.073376689376801 0.091562815442891 0.316355112995341 0.391248235848303 0.391248235848303 0.391248235848303 0.511529541929475 0.511529541929475 0.511529541929475 0.725311553671326 0.227881629001553 0.273845532845421 0.061060698460855 0.273845532845421 0.073376689376801 0.341717079316923 0.073376689376801 0.091562815442891 0.227881629001553 0.273845532845421 0.061060698460855 0.273845532845421 0.073376689376801 0.341717079316923 0.073376689376801 0.091562815442891]

v=[0.227881629001553 0.273845532845421 0.061060698460855 0.273845532845421 0.073376689376801 0.341717079316923 0.073376689376801 0.091562815442891 0.227881629001553 0.273845532845421 0.273845532845421 0.061060698460855 0.341717079316923 0.073376689376801 0.073376689376801 0.091562815442891 0.316355112995341 0.391248235848303 0.391248235848303 0.391248235848303 0.511529541929475 0.511529541929475 0.511529541929475 0.725311553671326 0.227881629001553 0.273845532845421 0.273845532845421 0.061060698460855 0.341717079316923 0.073376689376801 0.073376689376801 0.091562815442891]

w=[0.227881629001553 0.061060698460855 0.273845532845421 0.273845532845421 0.073376689376801 0.073376689376801 0.341717079316923 0.091562815442891 0.227881629001553 0.061060698460855 0.273845532845421 0.273845532845421 0.073376689376801 0.073376689376801 0.341717079316923 0.091562815442891 0.227881629001553 0.061060698460855 0.273845532845421 0.273845532845421 0.073376689376801 0.073376689376801 0.341717079316923 0.091562815442891 0.316355112995341 0.391248235848303 0.391248235848303 0.391248235848303 0.511529541929475 0.511529541929475 0.511529541929475 0.725311553671326]

w1=[0.002202496253542 0.003658013658362 0.003658013658362 0.003658013658362 0.006163874201720 0.006163874201720 0.006163874201720 0.009998506832877 0.002202496253542 0.003658013658362 0.003658013658362 0.003658013658362 0.006163874201720 0.006163874201720 0.006163874201720 0.009998506832877 0.002202496253542 0.003658013658362 0.003658013658362 0.003658013658362 0.006163874201720 0.006163874201720 0.006163874201720 0.009998506832877 0.002202496253542 0.003658013658362 0.003658013658362 0.003658013658362 0.006163874201720 0.006163874201720 0.006163874201720 0.009998506832877]

x=u+(0.252065.* w.* u)+(0.164784 .*v .*u);

y=v+(0.0985905.* w.* v)+(0.164784.* v .*u);

z=w+(0.0985905.* w .*v)+(0.252065.* w .*u);

J1=((1+(0.350655.*w)+(0.0248512.*(w.^2))+(0.263375.*v)+(0.0410974.*w.*v)+(0.0162462.*(v.^2))+(0.416849.*u)+(0.0663876.*w.*u)+(0.0577826.*v.*u)+(0.0163804.*w.*v.*u)+(0.0415364.*(u.^2))).*w1);

f1=((((x+((1/sqrt(2)).*y)+((1/sqrt(3)).*z)).^2).*(((1/sqrt(2)).*y) + ((1/sqrt(3)).*z))).*abs(J1));

f2=1.*abs(J1);

f3=(((x+((1/sqrt(2)).*y)+((1/sqrt(3)).*z)).*(((1/sqrt(2)).*y)+((1/sqrt(3)).*z)).*((1/sqrt(3)).*z)).*abs(J1));

f4=((((x+(1/sqrt(2)).*y+(1/sqrt(3)).*z).^2).*((1/sqrt(2)).*y+(1/sqrt(3)).*z).*(z/sqrt(3))).*abs(J1));

f5=(sqrt(2.*(x+(y/sqrt(2))+(z/sqrt(3)))+3.*((y/sqrt(2))+(z/sqrt(3)))+(z/sqrt(3))).*abs(J1));

f6=(((1./(sqrt((2*(x+((1/sqrt(2)).*y)+((1/sqrt(3)).*z)))+(3*(((1/sqrt(2)).*y)+((1/sqrt(3)).*z)))+((1/sqrt(3)).*z))))).*abs(J1));

f7=(((x+(1/sqrt(2)).*y+(1/sqrt(3)).*z).^2.*((1/sqrt(2)).*y+(1/sqrt(3)).*z).^2).*abs(J1));

f8=((((1+2.*(x+(y/sqrt(2))+(z/sqrt(3)))+3.*((y/sqrt(2))+(z/sqrt(3)))+(z/sqrt(3)))).^-4).*abs(J1));

f9=((sin((2.*(x+(y/sqrt(2))+(z/sqrt(3))))+(6.*((y/sqrt(2))+(z/sqrt(3))))+(4.*(z/sqrt(3))))).*abs(J1));

f10=((1-(2.*(x+(y/sqrt(2))+(z/sqrt(3))))-(3.*((y/sqrt(2))+(z/sqrt(3))))-(z/sqrt(3))).*abs(J1));

f11=(((x.*y.*z)./(((x.^2)+(y.^2)+(z.^2)).^(1/2))).*abs(J1));

G1=sum(abs((6*f10/sqrt(6))))

A1=sum(abs((72*f1)/sqrt(6)))

A11=sum(abs((6*f2)/sqrt(6)))

B1=sum(abs((36*f3/sqrt(6))))

b1=sum(abs((72*f4)/sqrt(6)))

C1=sum(abs((6*f5/sqrt(6))))

c1=sum(abs((6*f6/sqrt(6))))

D1=sum(abs((216*f7/sqrt(6))))

d1=sum(abs((6*f8/sqrt(6))))

E1=sum(abs((6*f9/sqrt(6))))

h1=sum(abs((6*f10/sqrt(6))))

F1=sum(abs((6*f11/sqrt(6))))

format long

A1;

format long

x;

format long

y;

format long

z;

format long

u;

format long

v;

format long

w;

format long

f1;

format long

J1;

**Volume S2**

u=[0.227881629001553 0.273845532845421 0.273845532845421 0.061060698460855 0.341717079316923 0.073376689376801 0.073376689376801 0.091562815442891 0.316355112995341 0.391248235848303 0.391248235848303 0.391248235848303 0.511529541929475 0.511529541929475 0.511529541929475 0.725311553671326 0.227881629001553 0.273845532845421 0.061060698460855 0.273845532845421 0.073376689376801 0.341717079316923 0.073376689376801 0.091562815442891 0.227881629001553 0.273845532845421 0.061060698460855 0.273845532845421 0.073376689376801 0.341717079316923 0.073376689376801 0.091562815442891]

v=[0.227881629001553 0.273845532845421 0.061060698460855 0.273845532845421 0.073376689376801 0.341717079316923 0.073376689376801 0.091562815442891 0.227881629001553 0.273845532845421 0.273845532845421 0.061060698460855 0.341717079316923 0.073376689376801 0.073376689376801 0.091562815442891 0.316355112995341 0.391248235848303 0.391248235848303 0.391248235848303 0.511529541929475 0.511529541929475 0.511529541929475 0.725311553671326 0.227881629001553 0.273845532845421 0.273845532845421 0.061060698460855 0.341717079316923 0.073376689376801 0.073376689376801 0.091562815442891]

w=[0.227881629001553 0.061060698460855 0.273845532845421 0.273845532845421 0.073376689376801 0.073376689376801 0.341717079316923 0.091562815442891 0.227881629001553 0.061060698460855 0.273845532845421 0.273845532845421 0.073376689376801 0.073376689376801 0.341717079316923 0.091562815442891 0.227881629001553 0.061060698460855 0.273845532845421 0.273845532845421 0.073376689376801 0.073376689376801 0.341717079316923 0.091562815442891 0.316355112995341 0.391248235848303 0.391248235848303 0.391248235848303 0.511529541929475 0.511529541929475 0.511529541929475 0.725311553671326]

w1=[0.002202496253542 0.003658013658362 0.003658013658362 0.003658013658362 0.006163874201720 0.006163874201720 0.006163874201720 0.009998506832877 0.002202496253542 0.003658013658362 0.003658013658362 0.003658013658362 0.006163874201720 0.006163874201720 0.006163874201720 0.009998506832877 0.002202496253542 0.003658013658362 0.003658013658362 0.003658013658362 0.006163874201720 0.006163874201720 0.006163874201720 0.009998506832877 0.002202496253542 0.003658013658362 0.003658013658362 0.003658013658362 0.006163874201720 0.006163874201720 0.006163874201720 0.009998506832877]

x=u+(0.252065.* w.* u)+(0.164784 .*v .*u);

y=v+(0.0985905.* w.* v)+(0.164784.* v .*u);

z=w+(0.0985905.* w .*v)+(0.252065.* w .*u);

J1=((1+(0.350655.*w)+(0.0248512.*(w.^2))+(0.263375.*v)+(0.0410974.*w.*v)+(0.0162462.*(v.^2))+(0.416849.*u)+(0.0663876.*w.*u)+(0.0577826.*v.*u)+(0.0163804.*w.*v.*u)+(0.0415364.*(u.^2))).*w1);

f1=(((((1/sqrt(2)).*x)+(1/sqrt(3)).*z).^2).*(y+((1/sqrt(2)).*x)+((1/sqrt(3)).*z))).*abs(J1);

f2=1.*abs(J1);

f3=((((1/sqrt(2)).*x+ (1/sqrt(3)).*z).*((1/sqrt(2)).*x+y+(1/sqrt(3)).*z).*((1/sqrt(3)).*z)).*abs(J1));

f4=(((((1/sqrt(2)).*x+(1/sqrt(3)).*z).^2).*((1/sqrt(2)).*x+y+(1/sqrt(3)).*z).*(z/sqrt(3))).*abs(J1));

f5=(sqrt(2.*((x/sqrt(2))+(z/sqrt(3)))+3.*((x/sqrt(2))+y+(z/sqrt(3)))+(z/sqrt(3))).*abs(J1));

f6=((1./(sqrt(2.*((x/sqrt(2))+(z/sqrt(3)))+3.*((x/sqrt(2))+y+(z/sqrt(3)))+(z/sqrt(3))))).*abs(J1));

f7=((((1/sqrt(2)).*x+(1/sqrt(3)).*z).^2.*((((1/sqrt(2))).*x+y+(1/sqrt(3)).*z).^2)).*abs(J1));

f8=((((1 + 2.*((x/sqrt(2))+(z/sqrt(3)))+3.*((x/sqrt(2))+y+(z/sqrt(3)))+(z/sqrt(3)))).^-4).*abs(J1));

f9=((sin(2.*((x/sqrt(2))+(z/sqrt(3)))+6.*((x/sqrt(2))+y+(z/sqrt(3)))+4.*(z/sqrt(3)))).*abs(J1));

f10=((1-(2.*((x/sqrt(2))+(z/sqrt(3))))-(3.*((x/sqrt(2))+y+(z/sqrt(3))))-(z/sqrt(3))).*abs(J1));

G2=sum(abs((6*f10/sqrt(6))))

A2=sum(abs((72*f1)/sqrt(6)))

A22=sum(abs((6*f2)/sqrt(6)))

B2=sum(abs((36*f3/sqrt(6))))

b2=sum(abs((72*f4)/sqrt(6)))

C2=sum(abs((6*f5/sqrt(6))))

c2=sum(abs((6*f6/sqrt(6))))

D2=sum(abs((216*f7/sqrt(6))))

d2=sum(abs((6*f8/sqrt(6))))

E2=sum(abs((6*f9/sqrt(6))))

format long

A2;

format long

x;

format long

y;

format long

z;

format long

u;

format long

v;

format long

w;

format long

f1;

format long

J1;

**Volume S3**

u=[0.227881629001553 0.273845532845421 0.273845532845421 0.061060698460855 0.341717079316923 0.073376689376801 0.073376689376801 0.091562815442891 0.316355112995341 0.391248235848303 0.391248235848303 0.391248235848303 0.511529541929475 0.511529541929475 0.511529541929475 0.725311553671326 0.227881629001553 0.273845532845421 0.061060698460855 0.273845532845421 0.073376689376801 0.341717079316923 0.073376689376801 0.091562815442891 0.227881629001553 0.273845532845421 0.061060698460855 0.273845532845421 0.073376689376801 0.341717079316923 0.073376689376801 0.091562815442891]

v=[0.227881629001553 0.273845532845421 0.061060698460855 0.273845532845421 0.073376689376801 0.341717079316923 0.073376689376801 0.091562815442891 0.227881629001553 0.273845532845421 0.273845532845421 0.061060698460855 0.341717079316923 0.073376689376801 0.073376689376801 0.091562815442891 0.316355112995341 0.391248235848303 0.391248235848303 0.391248235848303 0.511529541929475 0.511529541929475 0.511529541929475 0.725311553671326 0.227881629001553 0.273845532845421 0.273845532845421 0.061060698460855 0.341717079316923 0.073376689376801 0.073376689376801 0.091562815442891]

w=[0.227881629001553 0.061060698460855 0.273845532845421 0.273845532845421 0.073376689376801 0.073376689376801 0.341717079316923 0.091562815442891 0.227881629001553 0.061060698460855 0.273845532845421 0.273845532845421 0.073376689376801 0.073376689376801 0.341717079316923 0.091562815442891 0.227881629001553 0.061060698460855 0.273845532845421 0.273845532845421 0.073376689376801 0.073376689376801 0.341717079316923 0.091562815442891 0.316355112995341 0.391248235848303 0.391248235848303 0.391248235848303 0.511529541929475 0.511529541929475 0.511529541929475 0.725311553671326]

w1=[0.002202496253542 0.003658013658362 0.003658013658362 0.003658013658362 0.006163874201720 0.006163874201720 0.006163874201720 0.009998506832877 0.002202496253542 0.003658013658362 0.003658013658362 0.003658013658362 0.006163874201720 0.006163874201720 0.006163874201720 0.009998506832877 0.002202496253542 0.003658013658362 0.003658013658362 0.003658013658362 0.006163874201720 0.006163874201720 0.006163874201720 0.009998506832877 0.002202496253542 0.003658013658362 0.003658013658362 0.003658013658362 0.006163874201720 0.006163874201720 0.006163874201720 0.009998506832877]

x=u+(0.252065.* w.* u)+(0.164784 .*v .*u);

y=v+(0.0985905.* w.* v)+(0.164784.* v .*u);

z=w+(0.0985905.* w .*v)+(0.252065.* w .*u);

J1=((1+(0.350655.*w)+(0.0248512.*(w.^2))+(0.263375.*v)+(0.0410974.*w.*v)+(0.0162462.*(v.^2))+(0.416849.*u)+(0.0663876.*w.*u)+(0.0577826.*v.*u)+(0.0163804.*w.*v.*u)+(0.0415364.*(u.^2))).*w1);

f1=(((((1/sqrt(3)).*z).^2).*(x+((1/sqrt(2)).*y) + ((1/sqrt(3)).*z))).*abs(J1));

f2=1.*abs(J1);

f3=((((1/sqrt(3)).*z).*(x+(1/sqrt(2)).*y+(1/sqrt(3)).*z).*((1/sqrt(2)).*y+(1/sqrt(3)).*z)).*abs(J1));

f4=(((((1/sqrt(3)).*z).^2).*(x+(1/sqrt(2)).*y+(1/sqrt(3)).*z).*((1/sqrt(2)).*y+(1/sqrt(3)).*z)).*abs(J1));

f5=((sqrt(2.*(z/sqrt(3))+3.*(x+(y/sqrt(2))+(z/sqrt(3)))+((y/sqrt(2))+(z/sqrt(3))))).*abs(J1));

f6=((1./(sqrt(2.*(z/sqrt(3))+3.*(x+(y/sqrt(2))+(z/sqrt(3)))+((y/sqrt(2))+(z/sqrt(3)))))).*abs(J1));

f7=(((((1/sqrt(3)).*z).^2).*(x+(1/sqrt(2)).*y+(1/sqrt(3)).*z).^2).*abs(J1));

f8=(((1+(2.*(z/sqrt(3)))+(3.*(x+(y/sqrt(2))+(z/sqrt(3))))+((y/sqrt(2))+(z/sqrt(3)))).^-4).*abs(J1));

f9=((sin(2.*(z/sqrt(3))+6.*(x+(y/sqrt(2))+(z/sqrt(3)))+4.*((y/sqrt(2))+(z/sqrt(3))))).*abs(J1));

f10=((1-(2.*(z/sqrt(3)))-(3.*(x+(y/sqrt(2))+(z/sqrt(3))))-((y/sqrt(2))+(z/sqrt(3)))).*abs(J1));

G3=sum(abs((6*f10/sqrt(6))))

A3=sum(abs((72*f1)/sqrt(6)))

A33=sum(abs((6*f2)/sqrt(6)))

B3=sum(abs((36*f3/sqrt(6))))

b3=sum(abs((72*f4)/sqrt(6)))

C3=sum(abs((6*f5/sqrt(6))))

c3=sum(abs((6*f6/sqrt(6))))

D3=sum(abs((216*f7/sqrt(6))))

d3=sum(abs((6*f8/sqrt(6))))

E3=sum(abs((6*f9/sqrt(6))))

format long

A3

format long

x;

format long

y;

format long

z;

format long

u;

format long

v;

format long

w;

format long

f1;

format long

J1;

**Volume S4**

u=[0.227881629001553 0.273845532845421 0.273845532845421 0.061060698460855 0.341717079316923 0.073376689376801 0.073376689376801 0.091562815442891 0.316355112995341 0.391248235848303 0.391248235848303 0.391248235848303 0.511529541929475 0.511529541929475 0.511529541929475 0.725311553671326 0.227881629001553 0.273845532845421 0.061060698460855 0.273845532845421 0.073376689376801 0.341717079316923 0.073376689376801 0.091562815442891 0.227881629001553 0.273845532845421 0.061060698460855 0.273845532845421 0.073376689376801 0.341717079316923 0.073376689376801 0.091562815442891]

v=[0.227881629001553 0.273845532845421 0.061060698460855 0.273845532845421 0.073376689376801 0.341717079316923 0.073376689376801 0.091562815442891 0.227881629001553 0.273845532845421 0.273845532845421 0.061060698460855 0.341717079316923 0.073376689376801 0.073376689376801 0.091562815442891 0.316355112995341 0.391248235848303 0.391248235848303 0.391248235848303 0.511529541929475 0.511529541929475 0.511529541929475 0.725311553671326 0.227881629001553 0.273845532845421 0.273845532845421 0.061060698460855 0.341717079316923 0.073376689376801 0.073376689376801 0.091562815442891]

w=[0.227881629001553 0.061060698460855 0.273845532845421 0.273845532845421 0.073376689376801 0.073376689376801 0.341717079316923 0.091562815442891 0.227881629001553 0.061060698460855 0.273845532845421 0.273845532845421 0.073376689376801 0.073376689376801 0.341717079316923 0.091562815442891 0.227881629001553 0.061060698460855 0.273845532845421 0.273845532845421 0.073376689376801 0.073376689376801 0.341717079316923 0.091562815442891 0.316355112995341 0.391248235848303 0.391248235848303 0.391248235848303 0.511529541929475 0.511529541929475 0.511529541929475 0.725311553671326]

w1=[0.002202496253542 0.003658013658362 0.003658013658362 0.003658013658362 0.006163874201720 0.006163874201720 0.006163874201720 0.009998506832877 0.002202496253542 0.003658013658362 0.003658013658362 0.003658013658362 0.006163874201720 0.006163874201720 0.006163874201720 0.009998506832877 0.002202496253542 0.003658013658362 0.003658013658362 0.003658013658362 0.006163874201720 0.006163874201720 0.006163874201720 0.009998506832877 0.002202496253542 0.003658013658362 0.003658013658362 0.003658013658362 0.006163874201720 0.006163874201720 0.006163874201720 0.009998506832877]

x=u+(0.252065.* w.* u)+(0.164784 .*v .*u);

y=v+(0.0985905.* w.* v)+(0.164784.* v .*u);

z=w+(0.0985905.* w .*v)+(0.252065.* w .*u);

J1=((1+(0.350655.*w)+(0.0248512.*(w.^2))+(0.263375.*v)+(0.0410974.*w.*v)+(0.0162462.*(v.^2))+(0.416849.*u)+(0.0663876.*w.*u)+(0.0577826.*v.*u)+(0.0163804.*w.*v.*u)+(0.0415364.*(u.^2))).*w1);

f1=(((((1/sqrt(3)).*z).^2).*(((1/sqrt(2)).*x) + ((1/sqrt(3)).*z))).*abs(J1));

f2=1.*abs(J1);

f3=((((1/sqrt(3)).*z).*((1/sqrt(2)).*x+(1/sqrt(3)).*z).*((1/sqrt(2)).*x+y+(1/sqrt(3)).*z)).*abs(J1));

f4=(((((1/sqrt(3)).*z).^2).*((1/sqrt(2)).*x+(1/sqrt(3)).*z).*(y+(1/sqrt(2)).*x+(1/sqrt(3)).*z)).*abs(J1));

f5=((sqrt(2.*(z/sqrt(3))+3.*((x/sqrt(2))+(z/sqrt(3)))+((x/sqrt(2))+y+(z/sqrt(3))))).*abs(J1));

f6=((1./(sqrt(2.*(z/sqrt(3))+3.*((x/sqrt(2))+(z/sqrt(3)))+((x/sqrt(2))+y+(z/sqrt(3)))))).*abs(J1));

f7=(((((1/sqrt(3)).*z).^2).*(((1/sqrt(2)).*x+(1/sqrt(3)).*z).^2)).*abs(J1));

f8=(((1+2.*(z/sqrt(3))+3.*((x/sqrt(2))+(z/sqrt(3))+((x/sqrt(2))+y+(z/sqrt(3))))).^-4).*abs(J1));

f9=((sin(2.*(z/sqrt(3))+6.*((x/sqrt(2))+(z/sqrt(3)))+4.*((x/sqrt(2))+y+(z/sqrt(3))))).*abs(J1));

f10=((1-(2.*(z/sqrt(3)))-(3.*((x/sqrt(2))+(z/sqrt(3))))-((x/sqrt(2))+y+(z/sqrt(3)))).*abs(J1));

G4=sum(abs((6*f10/sqrt(6))))

A4=sum(abs((72*f1)/sqrt(6)))

A44=sum(abs((6*f2)/sqrt(6)))

B4=sum(abs((36*f3/sqrt(6))))

b4=sum(abs((72*f4)/sqrt(6)))

C4=sum(abs((6*f5/sqrt(6))))

c4=sum(abs((6*f6/sqrt(6))))

D4=sum(abs((216*f7/sqrt(6))))

d4=sum(abs((6*f8/sqrt(6))))

E4=sum(abs((6*f9/sqrt(6))))

format long

A4;

format long

x;

format long

y;

format long

z;

format long

u;

format long

v;

format long

w;

format long

f1;

format long

J1;

**Volume S5**

u=[0.227881629001553 0.273845532845421 0.273845532845421 0.061060698460855 0.341717079316923 0.073376689376801 0.073376689376801 0.091562815442891 0.316355112995341 0.391248235848303 0.391248235848303 0.391248235848303 0.511529541929475 0.511529541929475 0.511529541929475 0.725311553671326 0.227881629001553 0.273845532845421 0.061060698460855 0.273845532845421 0.073376689376801 0.341717079316923 0.073376689376801 0.091562815442891 0.227881629001553 0.273845532845421 0.061060698460855 0.273845532845421 0.073376689376801 0.341717079316923 0.073376689376801 0.091562815442891]

v=[0.227881629001553 0.273845532845421 0.061060698460855 0.273845532845421 0.073376689376801 0.341717079316923 0.073376689376801 0.091562815442891 0.227881629001553 0.273845532845421 0.273845532845421 0.061060698460855 0.341717079316923 0.073376689376801 0.073376689376801 0.091562815442891 0.316355112995341 0.391248235848303 0.391248235848303 0.391248235848303 0.511529541929475 0.511529541929475 0.511529541929475 0.725311553671326 0.227881629001553 0.273845532845421 0.273845532845421 0.061060698460855 0.341717079316923 0.073376689376801 0.073376689376801 0.091562815442891]

w=[0.227881629001553 0.061060698460855 0.273845532845421 0.273845532845421 0.073376689376801 0.073376689376801 0.341717079316923 0.091562815442891 0.227881629001553 0.061060698460855 0.273845532845421 0.273845532845421 0.073376689376801 0.073376689376801 0.341717079316923 0.091562815442891 0.227881629001553 0.061060698460855 0.273845532845421 0.273845532845421 0.073376689376801 0.073376689376801 0.341717079316923 0.091562815442891 0.316355112995341 0.391248235848303 0.391248235848303 0.391248235848303 0.511529541929475 0.511529541929475 0.511529541929475 0.725311553671326]

w1=[0.002202496253542 0.003658013658362 0.003658013658362 0.003658013658362 0.006163874201720 0.006163874201720 0.006163874201720 0.009998506832877 0.002202496253542 0.003658013658362 0.003658013658362 0.003658013658362 0.006163874201720 0.006163874201720 0.006163874201720 0.009998506832877 0.002202496253542 0.003658013658362 0.003658013658362 0.003658013658362 0.006163874201720 0.006163874201720 0.006163874201720 0.009998506832877 0.002202496253542 0.003658013658362 0.003658013658362 0.003658013658362 0.006163874201720 0.006163874201720 0.006163874201720 0.009998506832877]

x=u+(0.252065.* w.* u)+(0.164784 .*v .*u);

y=v+(0.0985905.* w.* v)+(0.164784.* v .*u);

z=w+(0.0985905.* w .*v)+(0.252065.* w .*u);

J1=((1+(0.350655.*w)+(0.0248512.*(w.^2))+(0.263375.*v)+(0.0410974.*w.*v)+(0.0162462.*(v.^2))+(0.416849.*u)+(0.0663876.*w.*u)+(0.0577826.*v.*u)+(0.0163804.*w.*v.*u)+(0.0415364.*(u.^2))).*w1);

f1=(((((1/sqrt(2)).*y)+(1/sqrt(3)).*z).^2).*((1/sqrt(3)).*z)).*abs(J1);

f2=1.*abs(J1);

f3=((((1/sqrt(2)).*y+(1/sqrt(3)).*z).*((1/sqrt(3)).*z).*((1/sqrt(2)).*y+x+(1/sqrt(3)).*z)).*abs(J1));

f4=(((((1/sqrt(2)).*y+(1/sqrt(3)).*z).^2).*((1/sqrt(3)).*z).*(x+(1/sqrt(2)).*y+(1/sqrt(3)).*z)).*abs(J1));

f5=((sqrt(2.*((y/sqrt(2))+(z/sqrt(3)))+3.*(z/sqrt(3))+((y/sqrt(2))+x+(z/sqrt(3))))).*abs(J1));

f6=((1./(sqrt(2.*((y/sqrt(2))+(z/sqrt(3)))+3.*(z/sqrt(3))+((y/sqrt(2))+x+(z/sqrt(3)))))).*abs(J1));

f7=(((((1/sqrt(2)).*y+(1/sqrt(3)).*z).^2).*(((1/sqrt(3)).*z).^2)).*abs(J1));

f8=((((1+2.*((y/sqrt(2))+(z/sqrt(3)))+3.*(z/sqrt(3))+((y/sqrt(2))+x+(z/sqrt(3))))).^-4).*abs(J1));

f9=((sin(2.*((y/sqrt(2))+(z/sqrt(3)))+6.*(z/sqrt(3))+4.*((y/sqrt(2))+x+(z/sqrt(3))))).*abs(J1));

f10=((1-(2.*((y/sqrt(2))+(z/sqrt(3))))-(3.*(z/sqrt(3)))-((y/sqrt(2))+x+(z/sqrt(3)))).*abs(J1));

G5=sum(abs((6*f10/sqrt(6))))

A5=sum(abs((72*f1)/sqrt(6)))

A55=sum(abs((6*f2)/sqrt(6)))

B5=sum(abs((36*f3/sqrt(6))))

b5=sum(abs((72*f4)/sqrt(6)))

C5=sum(abs((6*f5/sqrt(6))))

c5=sum(abs((6*f6/sqrt(6))))

D5=sum(abs((216*f7/sqrt(6))))

d5=sum(abs((6*f8/sqrt(6))))

E5=sum(abs((6*f9/sqrt(6))))

format long

A5;

format long

x;

format long

y;

format long

z;

format long

u;

format long

v;

format long

w;

format long

f1;

format long

J1;

**Volume S6**

u=[0.227881629001553 0.273845532845421 0.273845532845421 0.061060698460855 0.341717079316923 0.073376689376801 0.073376689376801 0.091562815442891 0.316355112995341 0.391248235848303 0.391248235848303 0.391248235848303 0.511529541929475 0.511529541929475 0.511529541929475 0.725311553671326 0.227881629001553 0.273845532845421 0.061060698460855 0.273845532845421 0.073376689376801 0.341717079316923 0.073376689376801 0.091562815442891 0.227881629001553 0.273845532845421 0.061060698460855 0.273845532845421 0.073376689376801 0.341717079316923 0.073376689376801 0.091562815442891]

v=[0.227881629001553 0.273845532845421 0.061060698460855 0.273845532845421 0.073376689376801 0.341717079316923 0.073376689376801 0.091562815442891 0.227881629001553 0.273845532845421 0.273845532845421 0.061060698460855 0.341717079316923 0.073376689376801 0.073376689376801 0.091562815442891 0.316355112995341 0.391248235848303 0.391248235848303 0.391248235848303 0.511529541929475 0.511529541929475 0.511529541929475 0.725311553671326 0.227881629001553 0.273845532845421 0.273845532845421 0.061060698460855 0.341717079316923 0.073376689376801 0.073376689376801 0.091562815442891]

w=[0.227881629001553 0.061060698460855 0.273845532845421 0.273845532845421 0.073376689376801 0.073376689376801 0.341717079316923 0.091562815442891 0.227881629001553 0.061060698460855 0.273845532845421 0.273845532845421 0.073376689376801 0.073376689376801 0.341717079316923 0.091562815442891 0.227881629001553 0.061060698460855 0.273845532845421 0.273845532845421 0.073376689376801 0.073376689376801 0.341717079316923 0.091562815442891 0.316355112995341 0.391248235848303 0.391248235848303 0.391248235848303 0.511529541929475 0.511529541929475 0.511529541929475 0.725311553671326]

w1=[0.002202496253542 0.003658013658362 0.003658013658362 0.003658013658362 0.006163874201720 0.006163874201720 0.006163874201720 0.009998506832877 0.002202496253542 0.003658013658362 0.003658013658362 0.003658013658362 0.006163874201720 0.006163874201720 0.006163874201720 0.009998506832877 0.002202496253542 0.003658013658362 0.003658013658362 0.003658013658362 0.006163874201720 0.006163874201720 0.006163874201720 0.009998506832877 0.002202496253542 0.003658013658362 0.003658013658362 0.003658013658362 0.006163874201720 0.006163874201720 0.006163874201720 0.009998506832877]

x=u+(0.252065.* w.* u)+(0.164784 .*v .*u);

y=v+(0.0985905.* w.* v)+(0.164784.* v .*u);

z=w+(0.0985905.* w .*v)+(0.252065.* w .*u);

J1=((1+(0.350655.*w)+(0.0248512.*(w.^2))+(0.263375.*v)+(0.0410974.*w.*v)+(0.0162462.*(v.^2))+(0.416849.*u)+(0.0663876.*w.*u)+(0.0577826.*v.*u)+(0.0163804.*w.*v.*u)+(0.0415364.*(u.^2))).*w1);

f1=((((y+(1/sqrt(2))*x+(1/sqrt(3))*z).^2).*((1/sqrt(3))*z)).*abs(J1));

f2=1.*abs(J1);

f3=((((1/sqrt(2)).*x+y+(1/sqrt(3)).*z).*((1/sqrt(3)).*z).*((1/sqrt(2)).*x+(1/sqrt(3)).*z)).*abs(J1));

f4=(((((1/sqrt(2)).*x+y+(1/sqrt(3)).*z).^2).*((1/sqrt(3)).*z).*((1/sqrt(2).*x+(1/sqrt(3)).*z))).*abs(J1));

f5=((sqrt((2.*(y+(x/sqrt(2))+(z/sqrt(3))))+3.*(z/sqrt(3))+((x/sqrt(2))+(z/sqrt(3))))).*abs(J1));

f6=((1./(sqrt(2.*(y+(x/sqrt(2))+(z/sqrt(3)))+3.*(z/sqrt(3))+((x/sqrt(2))+(z/sqrt(3)))))).*abs(J1));

f7=(((((1/sqrt(2)).*x+y+(1/sqrt(3)).*z).^2).*(((1/sqrt(3)).*z).^2)).*abs(J1));

f8=((((1+2.*(y+(x/sqrt(2))+(z/sqrt(3)))+3.*(z/sqrt(3))+((x/sqrt(2))+(z/sqrt(3))))).^-4).*abs(J1));

f9=((sin(2.*(y+(x/sqrt(2))+(z/sqrt(3)))+6.*(z/sqrt(3))+4.*((x/sqrt(2))+(z/sqrt(3))))).*abs(J1));

f10=((1-(2.*(y+(x/sqrt(2))+(z/sqrt(3))))-(3.*(z/sqrt(3)))-((x/sqrt(2))+(z/sqrt(3)))).*abs(J1));

G6=sum(abs((6*f10/sqrt(6))))

A6=sum(abs((72*f1)/sqrt(6)))

A66=sum(abs((6*f2)/sqrt(6)))

B6=sum(abs((36*f3/sqrt(6))))

b6=sum(abs((72*f4)/sqrt(6)))

C6=sum(abs((6*f5/sqrt(6))))

c6=sum(abs((6*f6/sqrt(6))))

D6=sum(abs((216*f7/sqrt(6))))

d6=sum(abs((6*f8/sqrt(6))))

E6=sum(abs((6*f9/sqrt(6))))

A1+A2+A3+A4+A5+A6

A11+A22+A33+A44+A55+A66

B1+B2+B3+B4+B5+B6

b1+b2+b3+b4+b5+b6

C1+C2+C3+C4+C5+C6

c1+c2+c3+c4+c5+c6

D1+D2+D3+D4+D5+D6

d1+d2+d3+d4+d5+d6

E1+E2+E3+E4+E5+E6

G1+G2+G3+G4+G5+G6

format long

A6;

format long

x;

format long

y;

format long

z;

format long

u;

format long

v;

format long

w;

format long

f1;

format long

J1;
